# Supplementary material
Source: PubMed Central journal article supplement (PMC2148369)
Supplement: pnas_0707304104_3.pdf [file pnas_0707304104_3.pdf]

Table 3. Studied green nephrite artifacts in Taiwan

| Locations<br>nos. of sites                  | n.o.a.s. | Age       | Materials           | Matrix mineral       |            | Inclusions  |                    | References |
|---------------------------------------------|----------|-----------|---------------------|----------------------|------------|-------------|--------------------|------------|
|                                             |          |           |                     |                      | Mg# ranges |             | ZnO <sup>[*]</sup> |            |
| TAIWAN (Main Island)                        |          |           |                     |                      |            |             |                    |            |
| Taipei area, northern Taiwan                |          |           |                     |                      |            |             |                    |            |
| 2 <sup>[a]</sup>                            | 3        | Neolithic | Adzes               | Tremolite-actinolite | 0.92-0.88  | Zn-chromite | 2.3                | 1, 2       |
| Hualian area, eastern Taiwan                |          |           |                     |                      |            |             |                    |            |
| 1 <sup>[b]</sup>                            | 3        | Neolithic | Worked pieces       | Tremolite-actinolite | 0.92-0.89  | Zn-chromite | 2.9                | 1, 2       |
| Taichung and Nantou areas, central Taiwan   |          |           |                     |                      |            |             |                    |            |
| 4 <sup>[c]</sup>                            | 22       | Neolithic | Adzes               | Tremolite-actinolite | 0.93-0.85  | Zn-chromite | 3.2                | 1, 2       |
| Gaoxing and Pingtong areas, southern Taiwan |          |           |                     |                      |            |             |                    |            |
| 2 <sup>[d]</sup>                            | 2        | Neolithic | Adze and ornament   | Tremolite-actinolite | 0.91-0.87  | Zn-chromite | 3.3                | 1, 2       |
| Taidong area, southeastern Taiwan           |          |           |                     |                      |            |             |                    |            |
| 8 <sup>[e]</sup>                            | 12       | Neolithic | Adzes and ornaments | Tremolite-actinolite | 0.93-0.83  | Zn-chromite | 8.0                | 1, 2, 3    |

n.o.a.s., numbers of analyzed samples; Mg#, Mg/[Mg+Fe<sup>2+</sup>] ratios of nephrite (Ca-amphibole: Ca<sub>2</sub>[Mg,Fe]<sub>5</sub>[Si,Al]<sub>8</sub>O<sub>22</sub>[OH]<sub>2</sub>);  
 [\*], maximum value of ZnO (wt%) in chromite inclusions of nephrite; analyzed by WDS-EPMA (1);

Site names: [a] Zhishanyan and Yuanshan; [b] Pinglin; [c] Qigu, Dongjiao, Qubing, and Shuiwaku; [d] Fengbitou and Kending;  
 [e] Beinan, Baishoulian, Shanyuan, Sanjian, Fushan, Laofanshe, Changguan, and Chaolaiqiao.

1. Iizuka Y, Hung HC (2005) *J Austronesian Studies* 1:35-79.
2. Iizuka Y, Bellwood P, Hung HC, Dizon E (2005) *J Austronesian Studies* 1:83-108.
3. Hung HC, Iizuka Y, Bellwood P (2006) in *Uncovering Southeast Asia's Past*, eds Bacus E, Glover I, Pigott V, (National Univ of Singapore, Singapore), pp 203-215.
